# Supplementary material
Source: PubMed Central journal article supplement (PMC7495335)
Supplement: jamacardiol-e203757-s001.pdf [file jamacardiol-e203757-s001.pdf]

## Supplementary Online Content

Desai AS, Maclean T, Blood AJ, et al. Remote optimization of guideline-directed medical therapy in patients with heart failure with reduced ejection fraction. *JAMA Cardiol*. Published online September 16, 2020. doi:10.1001/jamacardio.2020.3757

**eFigure.** Patient Selection

**eTable.** Adverse Events, by Study Group

**eMethods.** Physician-LIP Collaborative Drug Therapy Management Plan

This supplementary material has been provided by the authors to give readers additional information about their work.

**eFigure. Patient Selection for the Remote Management Intervention**

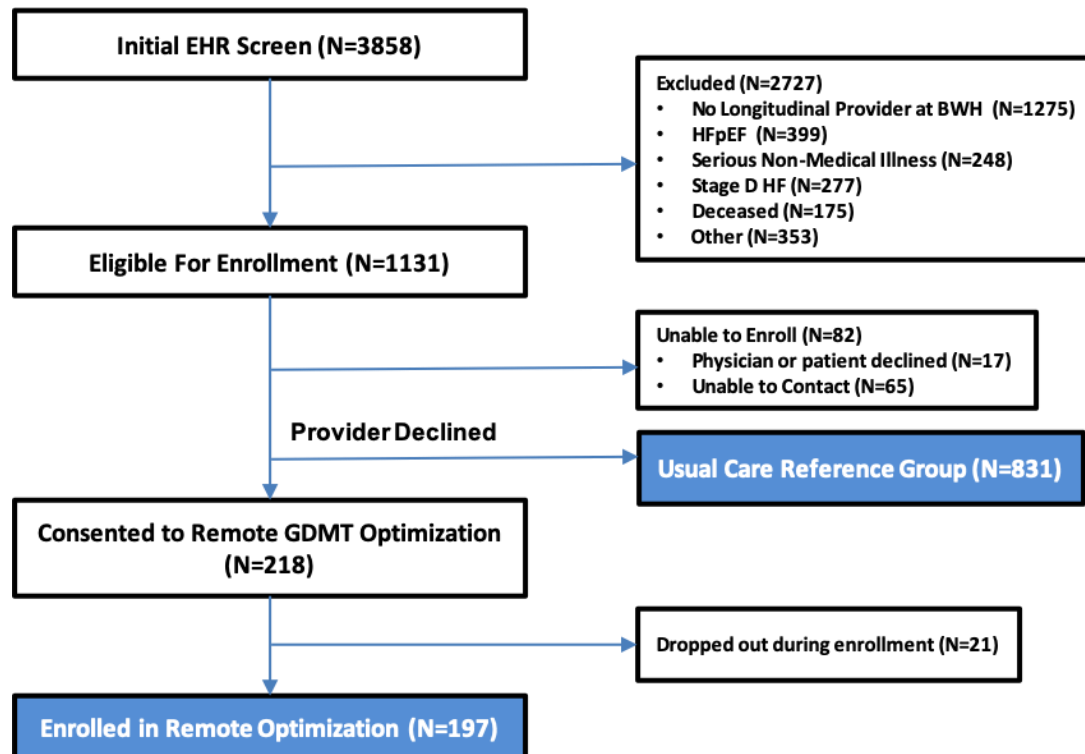

**eTable. Adverse Events of Interest, by study group**

|                                                           | <b>REMOTE GDMT<br/>OPTIMIZATION<br/>(N=197)</b> | <b>USUAL CARE<br/>(N=831)</b> | <b>P-VALUE</b>   |
|-----------------------------------------------------------|-------------------------------------------------|-------------------------------|------------------|
| <b>Symptomatic Hypotension* – n (%)</b>                   | <b>7 (3.6)</b>                                  | <b>34 (4.2)</b>               | <b>0.84</b>      |
| <b>Hyperkalemia (K<math>\geq</math>5.5 meq/L) – n (%)</b> | <b>5 (2.5)</b>                                  | <b>59 (9.9)</b>               | <b>0.01</b>      |
| <b>Hyperkalemia (K<math>\geq</math>6.0 meq/L) – n (%)</b> | <b>4 (2.0)</b>                                  | <b>35 (4.2)</b>               | <b>0.21</b>      |
| <b>Rise in Serum Cr &gt; 0.3 mg/dL – n (%)</b>            | <b>18 (9.1)</b>                                 | <b>3 (0.4)</b>                | <b>&lt;0.001</b> |
| <b>Cardiovascular Hospitalization – n (%)</b>             | <b>18 (9.1)</b>                                 | <b>92 (11.1)</b>              | <b>0.52</b>      |
| <b>Death – n (%)</b>                                      | <b>1 (0.5)</b>                                  | <b>8 (0.9)</b>                | <b>0.84</b>      |

\*Symptomatic hypotension defined as SBP<100 mm Hg in association with dizziness/lightheadedness
